# Supplementary material
Source: MDPI journal article supplement (https://www.mdpi.com/2220-9964/10/6/364)
Supplement: s1 [file s1]

# Supplementary Materials: Improving Victimization Risk Estimation: A Geographically Weighted Regression Approach

Rafael G. Ramos

The following Table S1 and Table S2 list the parameter values tested for the two-population case, along with fitness values obtained. Due to space constraints, Table S1 shows the fitness scores of the estimated risks for the first reference population, while Table S2 shows the fitness scores of the risk for the second population.

**Table S1.** Fitness scores for the estimated risk of the first reference population. Bold is used to indicate which parameters are change from one row to the next.

| Parameters   |              |                   |                 |              |              |                   |                  |              | Fit for Estimated R1 |             |             |
|--------------|--------------|-------------------|-----------------|--------------|--------------|-------------------|------------------|--------------|----------------------|-------------|-------------|
| Range (R1)   | Range (P1)   | Partial Sill (P1) | Nugget (P1)     | Range (R2)   | Range (P2)   | Partial Sill (P2) | Nugget (P2)      | $\epsilon_c$ | Fit (Naïve)          | Fit (GWR)   | Fit (Bayes) |
| 50.00        | 7.00         | 16500.00          | <b>1250.00</b>  | 10.00        | 36.00        | 180000.00         | 58000.00         | 15%          | <b>0.01</b>          | <b>0.71</b> | <b>0.01</b> |
| 50.00        | 7.00         | 16500.00          | <b>2500.00</b>  | 10.00        | 36.00        | 180000.00         | 58000.00         | 15%          | <b>0.01</b>          | <b>0.71</b> | <b>0.01</b> |
| 50.00        | 7.00         | 16500.00          | <b>5000.00</b>  | 10.00        | 36.00        | 180000.00         | 58000.00         | 15%          | <b>0.01</b>          | <b>0.75</b> | <b>0.01</b> |
| 50.00        | 7.00         | 16500.00          | <b>10000.00</b> | 10.00        | 36.00        | 180000.00         | 58000.00         | 15%          | <b>0.00</b>          | <b>0.79</b> | <b>0.01</b> |
| <b>75.00</b> | 7.00         | 16500.00          | 1250.00         | 10.00        | 36.00        | 180000.00         | 58000.00         | 15%          | <b>0.01</b>          | <b>0.67</b> | <b>0.01</b> |
| <b>25.00</b> | 7.00         | 16500.00          | 1250.00         | 10.00        | 36.00        | 180000.00         | 58000.00         | 15%          | <b>0.01</b>          | <b>0.69</b> | <b>0.01</b> |
| <b>10.00</b> | 7.00         | 16500.00          | 1250.00         | 10.00        | 36.00        | 180000.00         | 58000.00         | 15%          | <b>0.01</b>          | <b>0.64</b> | <b>0.01</b> |
| <b>5.00</b>  | 7.00         | 16500.00          | 1250.00         | 10.00        | 36.00        | 180000.00         | 58000.00         | 15%          | <b>0.01</b>          | <b>0.49</b> | <b>0.01</b> |
| 50.00        | <b>3.50</b>  | 16500.00          | 1250.00         | 10.00        | 36.00        | 180000.00         | 58000.00         | 15%          | <b>0.01</b>          | <b>0.74</b> | <b>0.01</b> |
| 50.00        | <b>14.00</b> | 16500.00          | 1250.00         | 10.00        | 36.00        | 180000.00         | 58000.00         | 15%          | <b>0.01</b>          | <b>0.57</b> | <b>0.03</b> |
| 50.00        | <b>28.00</b> | 16500.00          | 1250.00         | 10.00        | 36.00        | 180000.00         | 58000.00         | 15%          | <b>0.08</b>          | <b>0.49</b> | <b>0.11</b> |
| 50.00        | <b>56.00</b> | 16500.00          | 1250.00         | 10.00        | 36.00        | 180000.00         | 58000.00         | 15%          | <b>0.11</b>          | <b>0.46</b> | <b>0.16</b> |
| 50.00        | 7.00         | <b>10000.00</b>   | 1250.00         | 10.00        | 36.00        | 180000.00         | 58000.00         | 15%          | <b>0.01</b>          | <b>0.68</b> | <b>0.01</b> |
| 50.00        | 7.00         | <b>20000.00</b>   | 1250.00         | 10.00        | 36.00        | 180000.00         | 58000.00         | 15%          | <b>0.01</b>          | <b>0.71</b> | <b>0.01</b> |
| 50.00        | 7.00         | <b>40000.00</b>   | 1250.00         | 10.00        | 36.00        | 180000.00         | 58000.00         | 15%          | <b>0.01</b>          | <b>0.65</b> | <b>0.01</b> |
| 50.00        | 7.00         | <b>80000.00</b>   | 1250.00         | 10.00        | 36.00        | 180000.00         | 58000.00         | 15%          | <b>0.02</b>          | <b>0.57</b> | <b>0.02</b> |
| 50.00        | 7.00         | 16500.00          | 1250.00         | <b>5.00</b>  | 36.00        | 180000.00         | 58000.00         | 15%          | <b>0.01</b>          | <b>0.70</b> | <b>0.01</b> |
| 50.00        | 7.00         | 16500.00          | 1250.00         | <b>20.00</b> | 36.00        | 180000.00         | 58000.00         | 15%          | <b>0.01</b>          | <b>0.74</b> | <b>0.02</b> |
| 50.00        | 7.00         | 16500.00          | 1250.00         | <b>40.00</b> | 36.00        | 180000.00         | 58000.00         | 15%          | <b>0.01</b>          | <b>0.71</b> | <b>0.01</b> |
| 50.00        | 7.00         | 16500.00          | 1250.00         | <b>80.00</b> | 36.00        | 180000.00         | 58000.00         | 15%          | <b>0.01</b>          | <b>0.72</b> | <b>0.02</b> |
| 50.00        | 7.00         | 16500.00          | 1250.00         | 10.00        | <b>18.00</b> | 180000.00         | 58000.00         | 15%          | <b>0.01</b>          | <b>0.72</b> | <b>0.01</b> |
| 50.00        | 7.00         | 16500.00          | 1250.00         | 10.00        | <b>9.00</b>  | 180000.00         | 58000.00         | 15%          | <b>0.01</b>          | <b>0.68</b> | <b>0.01</b> |
| 50.00        | 7.00         | 16500.00          | 1250.00         | 10.00        | <b>4.50</b>  | 180000.00         | 58000.00         | 15%          | <b>0.01</b>          | <b>0.70</b> | <b>0.01</b> |
| 50.00        | 7.00         | 16500.00          | 1250.00         | 10.00        | 36.00        | <b>90000.00</b>   | 58000.00         | 15%          | <b>0.01</b>          | <b>0.72</b> | <b>0.01</b> |
| 50.00        | 7.00         | 16500.00          | 1250.00         | 10.00        | 36.00        | <b>45000.00</b>   | 58000.00         | 15%          | <b>0.01</b>          | <b>0.69</b> | <b>0.01</b> |
| 50.00        | 7.00         | 16500.00          | 1250.00         | 10.00        | 36.00        | <b>22500.00</b>   | 58000.00         | 15%          | <b>0.01</b>          | <b>0.71</b> | <b>0.01</b> |
| 50.00        | 7.00         | 16500.00          | 1250.00         | 10.00        | 36.00        | <b>360000.00</b>  | 58000.00         | 15%          | <b>0.01</b>          | <b>0.66</b> | <b>0.01</b> |
| 50.00        | 7.00         | 16500.00          | 1250.00         | 10.00        | 36.00        | 180000.00         | <b>29000.00</b>  | 15%          | <b>0.01</b>          | <b>0.65</b> | <b>0.01</b> |
| 50.00        | 7.00         | 16500.00          | 1250.00         | 10.00        | 36.00        | 180000.00         | <b>14500.00</b>  | 15%          | <b>0.01</b>          | <b>0.71</b> | <b>0.01</b> |
| 50.00        | 7.00         | 16500.00          | 1250.00         | 10.00        | 36.00        | 180000.00         | <b>7250.00</b>   | 15%          | <b>0.01</b>          | <b>0.69</b> | <b>0.01</b> |
| 50.00        | 7.00         | 16500.00          | 1250.00         | 10.00        | 36.00        | 180000.00         | <b>116000.00</b> | 15%          | <b>0.01</b>          | <b>0.69</b> | <b>0.01</b> |
| 50.00        | 7.00         | 16500.00          | 1250.00         | 10.00        | 36.00        | 180000.00         | 58000.00         | <b>5%</b>    | <b>0.01</b>          | <b>0.72</b> | <b>0.04</b> |
| 50.00        | 7.00         | 16500.00          | 1250.00         | 10.00        | 36.00        | 180000.00         | 58000.00         | <b>10%</b>   | <b>0.01</b>          | <b>0.70</b> | <b>0.02</b> |
| 50.00        | 7.00         | 16500.00          | 1250.00         | 10.00        | 36.00        | 180000.00         | 58000.00         | <b>50%</b>   | <b>0.01</b>          | <b>0.64</b> | <b>0.01</b> |
| 50.00        | 7.00         | 16500.00          | 1250.00         | 10.00        | 36.00        | 180000.00         | 58000.00         | <b>100%</b>  | <b>0.01</b>          | <b>0.63</b> | <b>0.01</b> |

**Table S2.** Fitness scores for the estimated risk of the second reference population. Bold is used to indicate which parameters are change from one row to the next.

| Parameters |            |                   |             |            |            |                   |             | Fit for Estimated R2 |             |           |             |
|------------|------------|-------------------|-------------|------------|------------|-------------------|-------------|----------------------|-------------|-----------|-------------|
| Range (R1) | Range (P1) | Partial Sill (P1) | Nugget (P1) | Range (R2) | Range (P2) | Partial Sill (P2) | Nugget (P2) | εc                   | Fit (Naïve) | Fit (GWR) | Fit (Bayes) |
| 50.00      | 7.00       | 16,500.00         | 1,250.00    | 10.00      | 36.00      | 180,000.00        | 58,000.00   | 15%                  | 0.01        | 0.26      | 0.02        |
| 50.00      | 7.00       | 16,500.00         | 2,500.00    | 10.00      | 36.00      | 180,000.00        | 58,000.00   | 15%                  | 0.01        | 0.30      | 0.01        |
| 50.00      | 7.00       | 16,500.00         | 5,000.00    | 10.00      | 36.00      | 180,000.00        | 58,000.00   | 15%                  | 0.01        | 0.29      | 0.02        |
| 50.00      | 7.00       | 16,500.00         | 10,000.00   | 10.00      | 36.00      | 180,000.00        | 58,000.00   | 15%                  | 0.01        | 0.30      | 0.01        |
| 75.00      | 7.00       | 16,500.00         | 1,250.00    | 10.00      | 36.00      | 180,000.00        | 58,000.00   | 15%                  | 0.01        | 0.30      | 0.01        |
| 25.00      | 7.00       | 16,500.00         | 1,250.00    | 10.00      | 36.00      | 180,000.00        | 58,000.00   | 15%                  | 0.01        | 0.23      | 0.01        |
| 10.00      | 7.00       | 16,500.00         | 1,250.00    | 10.00      | 36.00      | 180,000.00        | 58,000.00   | 15%                  | 0.01        | 0.18      | 0.01        |
| 5.00       | 7.00       | 16,500.00         | 1,250.00    | 10.00      | 36.00      | 180,000.00        | 58,000.00   | 15%                  | 0.01        | 0.15      | 0.01        |
| 50.00      | 3.50       | 16,500.00         | 1,250.00    | 10.00      | 36.00      | 180,000.00        | 58,000.00   | 15%                  | 0.01        | 0.27      | 0.01        |
| 50.00      | 14.00      | 16,500.00         | 1,250.00    | 10.00      | 36.00      | 180,000.00        | 58,000.00   | 15%                  | 0.01        | 0.28      | 0.01        |
| 50.00      | 28.00      | 16,500.00         | 1,250.00    | 10.00      | 36.00      | 180,000.00        | 58,000.00   | 15%                  | 0.01        | 0.30      | 0.01        |
| 50.00      | 56.00      | 16,500.00         | 1,250.00    | 10.00      | 36.00      | 180,000.00        | 58,000.00   | 15%                  | 0.01        | 0.38      | 0.01        |
| 50.00      | 7.00       | 10,000.00         | 1,250.00    | 10.00      | 36.00      | 180,000.00        | 58,000.00   | 15%                  | 0.01        | 0.32      | 0.01        |
| 50.00      | 7.00       | 20,000.00         | 1,250.00    | 10.00      | 36.00      | 180,000.00        | 58,000.00   | 15%                  | 0.01        | 0.28      | 0.01        |
| 50.00      | 7.00       | 40,000.00         | 1,250.00    | 10.00      | 36.00      | 180,000.00        | 58,000.00   | 15%                  | 0.01        | 0.29      | 0.01        |
| 50.00      | 7.00       | 80,000.00         | 1,250.00    | 10.00      | 36.00      | 180,000.00        | 58,000.00   | 15%                  | 0.01        | 0.25      | 0.01        |
| 50.00      | 7.00       | 16,500.00         | 1,250.00    | 5.00       | 36.00      | 180,000.00        | 58,000.00   | 15%                  | 0.00        | 0.23      | 0.00        |
| 50.00      | 7.00       | 16,500.00         | 1,250.00    | 20.00      | 36.00      | 180,000.00        | 58,000.00   | 15%                  | 0.01        | 0.26      | 0.01        |
| 50.00      | 7.00       | 16,500.00         | 1,250.00    | 40.00      | 36.00      | 180,000.00        | 58,000.00   | 15%                  | 0.02        | 0.23      | 0.02        |
| 50.00      | 7.00       | 16,500.00         | 1,250.00    | 80.00      | 36.00      | 180,000.00        | 58,000.00   | 15%                  | 0.01        | 0.23      | 0.01        |
| 50.00      | 7.00       | 16,500.00         | 1,250.00    | 10.00      | 18.00      | 180,000.00        | 58,000.00   | 15%                  | 0.01        | 0.30      | 0.01        |
| 50.00      | 7.00       | 16,500.00         | 1,250.00    | 10.00      | 9.00       | 180,000.00        | 58,000.00   | 15%                  | 0.01        | 0.29      | 0.01        |
| 50.00      | 7.00       | 16,500.00         | 1,250.00    | 10.00      | 4.50       | 180,000.00        | 58,000.00   | 15%                  | 0.00        | 0.41      | 0.00        |
| 50.00      | 7.00       | 16,500.00         | 1,250.00    | 10.00      | 36.00      | 90,000.00         | 58,000.00   | 15%                  | 0.01        | 0.34      | 0.01        |
| 50.00      | 7.00       | 16,500.00         | 1,250.00    | 10.00      | 36.00      | 45,000.00         | 58,000.00   | 15%                  | 0.00        | 0.36      | 0.01        |
| 50.00      | 7.00       | 16,500.00         | 1,250.00    | 10.00      | 36.00      | 22,500.00         | 58,000.00   | 15%                  | 0.01        | 0.43      | 0.01        |
| 50.00      | 7.00       | 16,500.00         | 1,250.00    | 10.00      | 36.00      | 360,000.00        | 58,000.00   | 15%                  | 0.00        | 0.46      | 0.00        |
| 50.00      | 7.00       | 16,500.00         | 1,250.00    | 10.00      | 36.00      | 180,000.00        | 29,000.00   | 15%                  | 0.01        | 0.23      | 0.01        |
| 50.00      | 7.00       | 16,500.00         | 1,250.00    | 10.00      | 36.00      | 180,000.00        | 14,500.00   | 15%                  | 0.02        | 0.21      | 0.02        |
| 50.00      | 7.00       | 16,500.00         | 1,250.00    | 10.00      | 36.00      | 180,000.00        | 7,250.00    | 15%                  | 0.02        | 0.11      | 0.03        |
| 50.00      | 7.00       | 16,500.00         | 1,250.00    | 10.00      | 36.00      | 180,000.00        | 116,000.00  | 15%                  | 0.02        | 0.09      | 0.03        |
| 50.00      | 7.00       | 16,500.00         | 1,250.00    | 10.00      | 36.00      | 180,000.00        | 58,000.00   | 5%                   | 0.01        | 0.42      | 0.01        |
| 50.00      | 7.00       | 16,500.00         | 1,250.00    | 10.00      | 36.00      | 180,000.00        | 58,000.00   | 10%                  | 0.01        | 0.30      | 0.01        |
| 50.00      | 7.00       | 16,500.00         | 1,250.00    | 10.00      | 36.00      | 180,000.00        | 58,000.00   | 50%                  | 0.01        | 0.28      | 0.01        |
| 50.00      | 7.00       | 16,500.00         | 1,250.00    | 10.00      | 36.00      | 180,000.00        | 58,000.00   | 100%                 | 0.01        | 0.27      | 0.01        |
